# Supplementary material for: Spindle assembly checkpoint inactivation fails to suppress neuroblast tumour formation in aurA mutant Drosophila
Source: PubMed Central journal article supplement (PMC4660220; doi:10.1038/ncomms9879), 2015-11-16
Supplement: ncomms9879-s1.pdf [file ncomms9879-s1.pdf]

**a**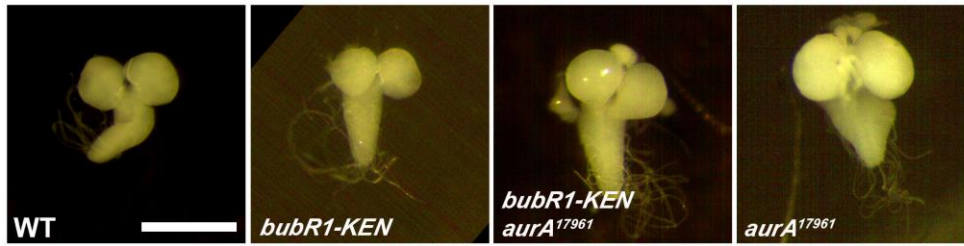**b**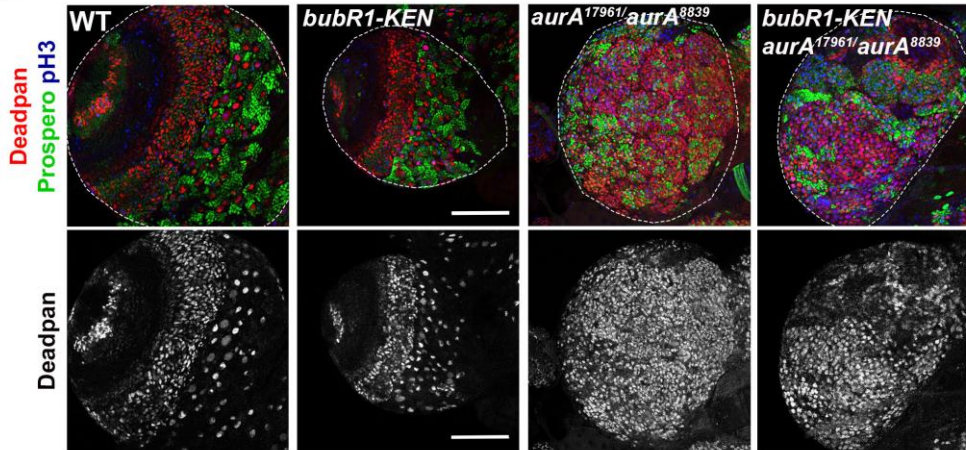**c**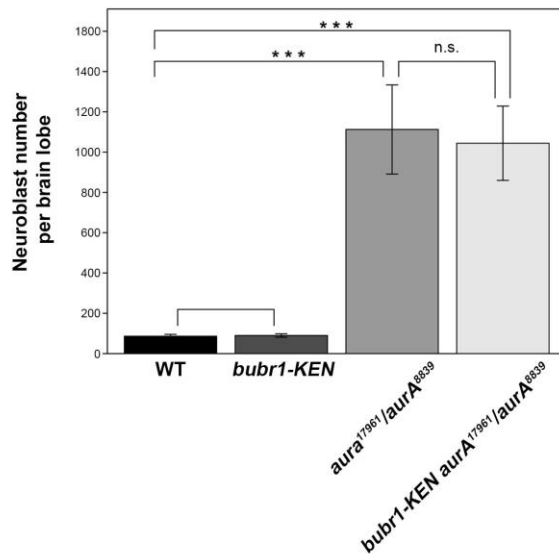

### Supplementary Figure 1. *bubR1-KEN*; *aurA* double mutants display brain overgrowth and NB amplification

**a)** Brains from WT, *bubR1-KEN*, *aurA<sup>17961</sup>* and *bubR1-KEN aurA<sup>17961</sup>* double-mutant individuals were dissected in PBS, fixed and immediately imaged. Note the huge brain expansion in *aurA<sup>17961</sup>* and in *bubR1-KEN aurA<sup>17961</sup>* double mutants 144 h after larval hatching (ALH). Scale bar: 200  $\mu$ m. **b)** Brains from the indicated genotypes were fixed and the numbers of pan-NBs per lobe were determined by staining of the central brain region with the anti-deadpan antibody (red and lower monochrome panels). The neuronal marker prospero is shown in green. Phospho-histone H3 (Ser10) is displayed in blue. Scale bar: 100  $\mu$ m.

**c)** Quantification of pan-NBs numbers ( $\pm$  SD) in WT, *bubR1-KEN*, *aurA<sup>17961</sup>/aurA<sup>8839</sup>* and *bubR1-KEN aurA<sup>17961</sup>/aurA<sup>8839</sup>* brain lobes. WT and *bubR1-KEN* brain lobes had  $86.0 \pm 9.3$  NBs/lobe, ( $n=5$ ) and  $89.5 \pm 9.5$  NBs/lobe ( $n=11$ ), respectively, whereas *aurA<sup>17961</sup>/aurA<sup>8839</sup>* lobes contained  $1112 \pm 221.3$  NBs per lobe ( $n=7$ ). Introduction of the *bubR1-KEN* mutation into the *aurA* defective background had no significant effect on NB number ( $1044.0 \pm 184.3$ ,  $n=8$ , ns:  $P=0.78$ ). \*\*\*:  $P < 3 \times 10^{-3}$  (Wilcoxon test).

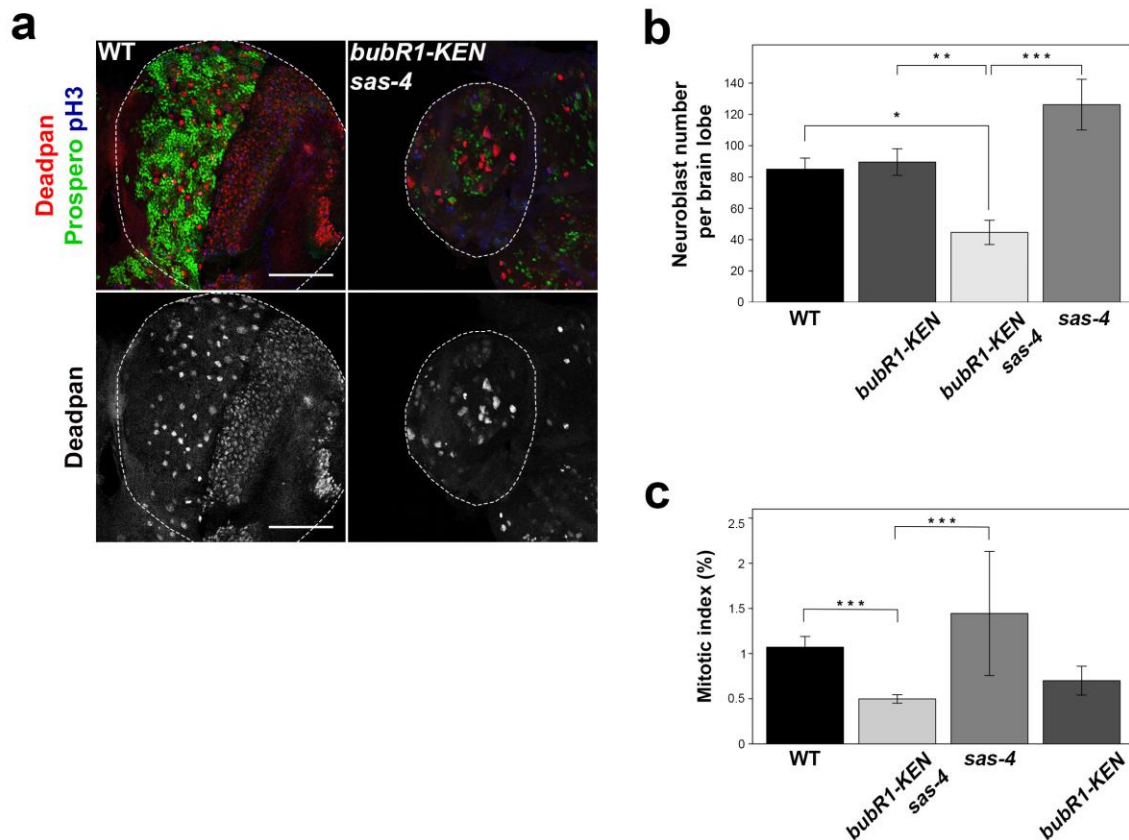

**Supplementary Figure 2. *bubR1-KEN sas-4* double mutants have smaller numbers of NBs and impaired brain growth**

**a)** Brains from WT or *bubR1-KEN sas-4* larvae were fixed and the numbers of pan-NBs per lobe were counted by staining of the central brain region with an anti-deadpan antibody (red and lower monochrome panels). The neuronal marker prospero is shown in green. Phospho-histone H3 (Ser10) is displayed in blue. Scale bar: 100  $\mu$ m.

**b)** Quantification of pan-NBs number ( $\pm$ SD) in WT, *bubR1-KEN*, *sas-4* and *bubR1-KEN sas-4* brain lobes. WT and *bubR1-KEN* brain lobes had  $85.0 \pm 7.1$  NBs/lobe ( $n=7$ ) and  $89.96 \pm 8.5$  NBs/lobe ( $n=8$ ) respectively. *Sas-4*:  $126.2 \pm 16.2$  NBs/lobe ( $n=8$ ). The introduction of the *bubR1-KEN* mutation in the *sas-4* defective background resulted in a much smaller number of NBs  $44.6 \pm 7.7$  NBs/lobe ( $n=8$ ). \*:  $P=1.4 \times 10^{-3}$ , \*\*:  $P=3.3 \times 10^{-4}$ , \*\*\*:  $P < 1.6 \times 10^{-5}$  (Wilcoxon test).

**c)** Analysis of mitotic indices ( $\pm$  SD) in WT, *sas-4*, *bubR1-KEN*, and *bubR1-KEN sas-4* Brains. WT:  $1.07 \pm 0.12\%$  ( $n=9899$ , 3 brains), *bubR1-KEN*:  $0.70 \pm 0.16\%$ , ( $n=5918$ , 3 brains), *sas-4*:  $1.44 \pm 0.69\%$ , ( $n=12417$ , 3 brains), and *bubR1-KEN sas-4*:  $0.50 \pm 0.05\%$  ( $n=5520$ , 3 brains). \*\*\*:  $P < 6 \times 10^{-6}$ , (Wilcoxon test).

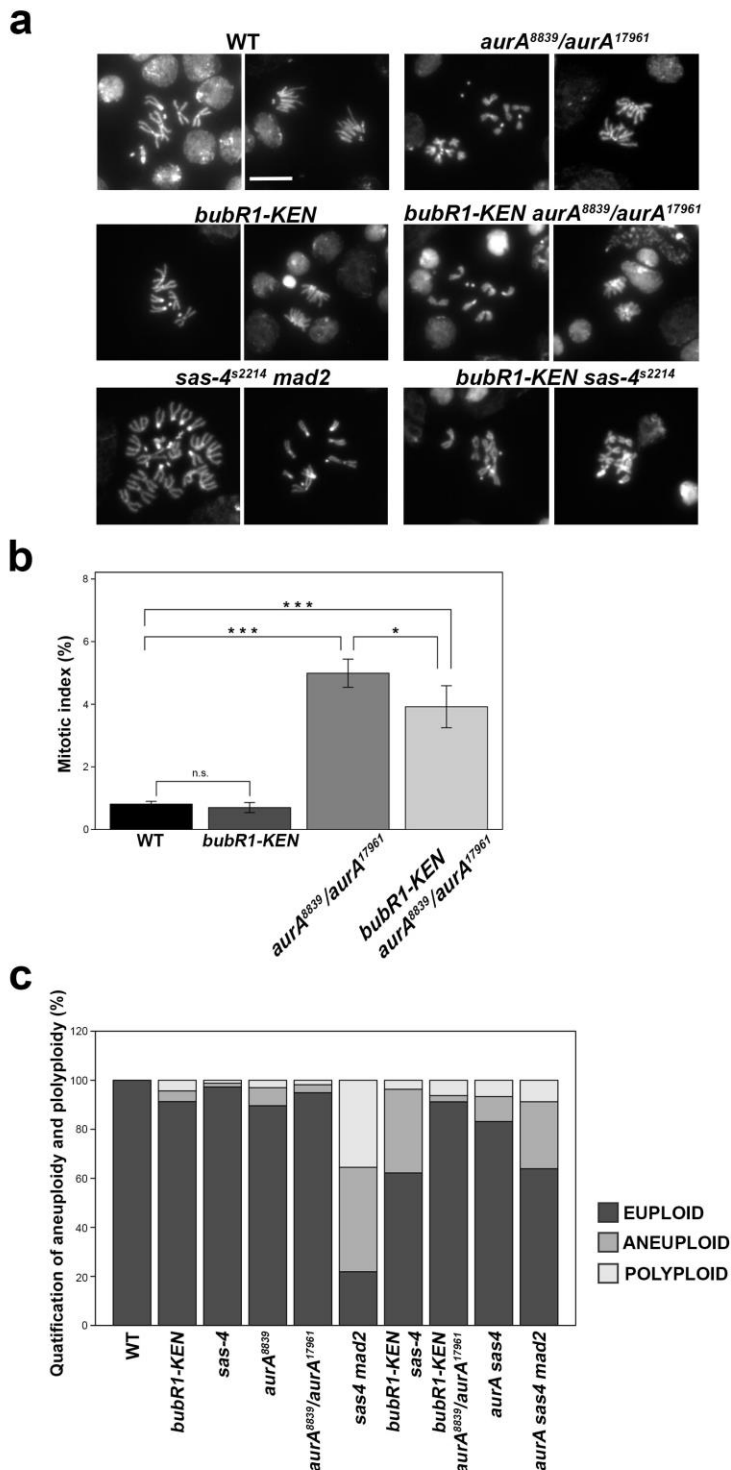

**Supplementary Figure 3. Analysis of mitotic chromosome number and mitotic indices in *sas-4* and *aurA* mutant flies following disruption of the SAC**

**a)** Selection of the most prominent mitotic figures observed in brain squashes for the genotypes indicated. The vast majority of cells are euploid in WT, *sas-4*, *mad2*, *bubR1-KEN*, and *aurA* flies. However, disrupting the SAC (*mad2* or *bubR1-KEN* mutants) in *sas-4*, but not in *aurA<sup>17961</sup>/aurA<sup>8839</sup>* flies, induced severe aneuploidy and polyploidy. **b)** Quantification of mitotic indices ( $\pm$  SD) for the indicated genotypes.

WT:  $0.81 \pm 0.09$  ( $n=5326$ , 3 brains), *bubR1-KEN*:  $0.7 \pm 0.16$  ( $n=5918$ , 4 brains), *aurA<sup>8839</sup>/aurA<sup>17961</sup>*:  $4.99 \pm 0.45$  ( $n=7435$ , 4 brains), *bubR1-KEN aurA<sup>8839</sup>/aurA<sup>17961</sup>*:  $3.92 \pm 0.67$  ( $n=11180$ , 5 brains). \*\*\*:  $P < 2 \times 10^{-16}$ , \*:  $P = 5 \times 10^{-4}$  (Wilcoxon test). **c)** Quantification of aneuploidy and polyploidy for the indicated genotypes.

The numbers in parentheses are the percentages of euploid, aneuploid and polyploid cells, respectively;  $n$  is the total number of mitotic cells observed, from at least 3 different brains.

WT (100, 0, 0,  $n=150$ ), *bubR1-KEN* (91.3, 4.4, 4.3,  $n=230$ ), *sas-4* (97.3, 1.5, 1.2,  $n=256$ ), *aurA<sup>8839</sup>* (89.6, 7.4, 3.0,  $n=299$ ), *aurA<sup>8839</sup>/aurA<sup>17961</sup>* (94.9, 3.3, 1.8,  $n=276$ ), *sas4 mad2* (21.9, 42.6, 35.5,  $n=169$ ), *bubR1-KEN sas-4* (62.2, 34.2, 3.7,  $n=82$ ), *bubR1-KEN aurA<sup>8839</sup>/aurA<sup>17961</sup>* (91.2, 2.6, 6.2,  $n=432$ ), *aurA<sup>8839</sup> sas-4* (83.2, 10.2, 6.6,  $n=315$ ), *aurA sas-4 mad2* (63.9, 27.3, 8.8,  $n=194$ ).

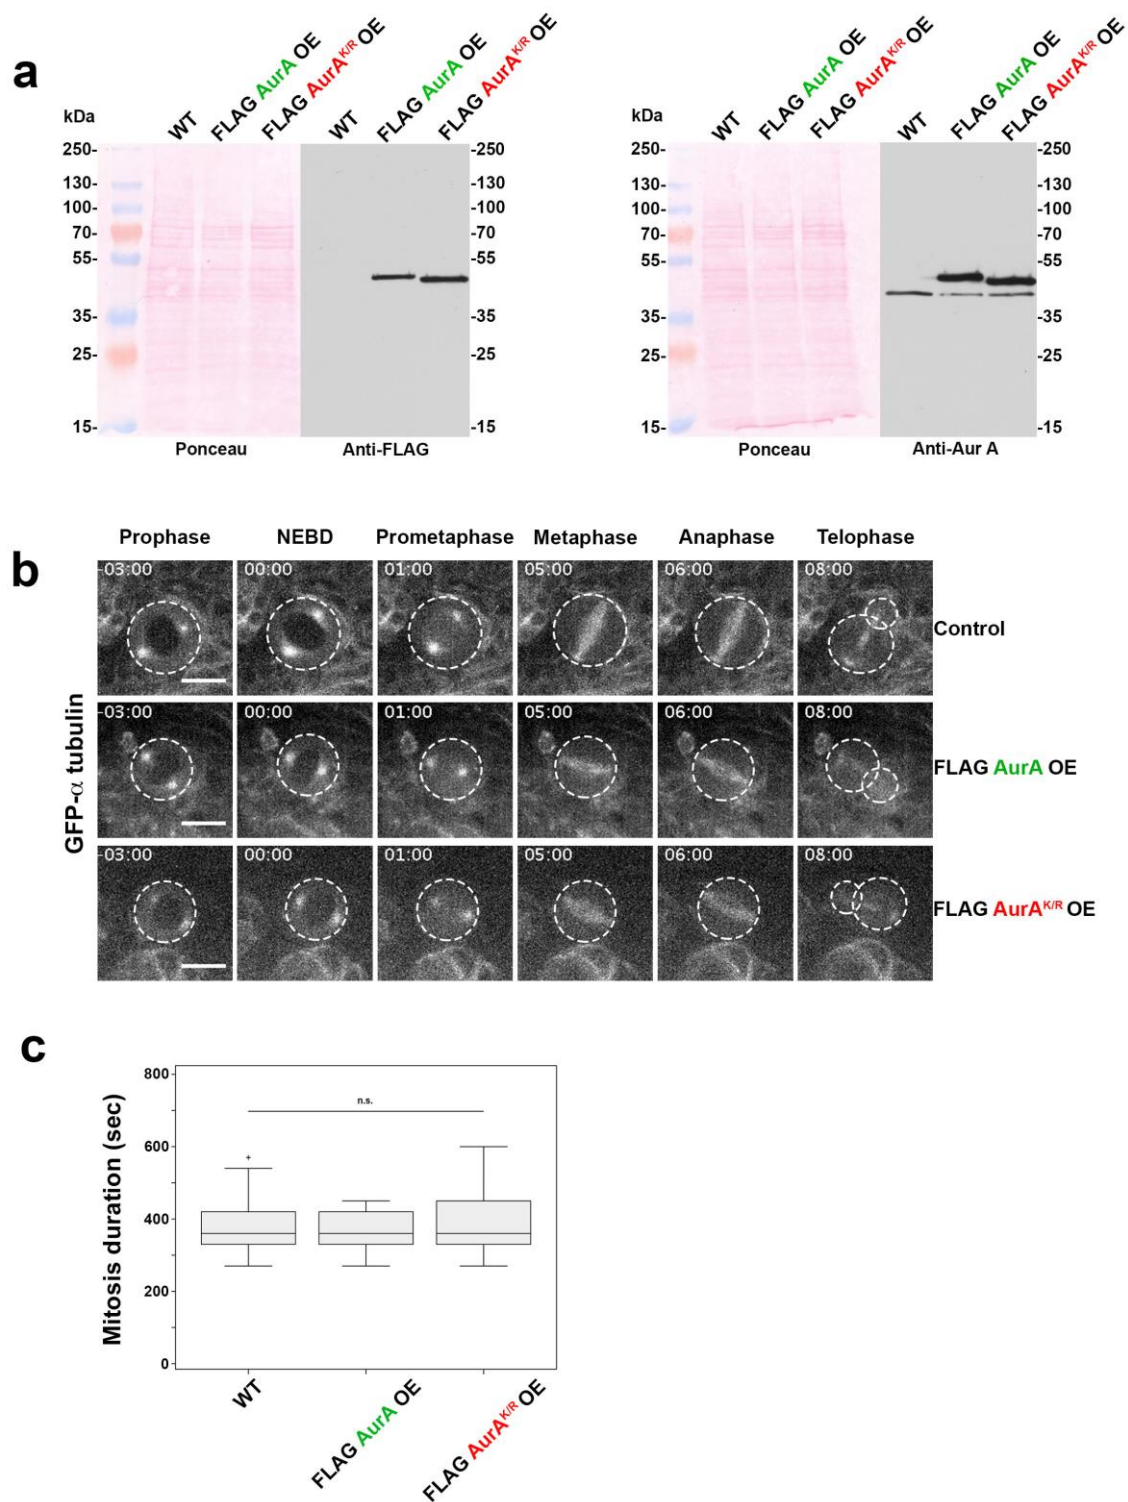

#### Supplementary Figure 4. AurA overexpression (OE) does not accelerate mitotic exit

**a)** Western blots showing the levels of endogenous and FLAG-tagged AurA variants in brain tissues. The FLAG western blot showing the overexpressed (AurA and AurA<sup>K/R</sup>) exogenous proteins is on the left and the western blot showing both endogenous and exogenous AurA proteins is shown on the right. Ponceau S staining was used to control for loading control.

**b)** AurA and AurA<sup>K/R</sup> OE NBs display normal mitotic timing and normal spindle morphology. WT (top panels), FLAG-AurA OE (middle panels), and FLAG-AurA<sup>K/R</sup> OE (lower panels) NBs were imaged with GFP- $\alpha$  tubulin.

**c)** Box plot showing the duration of mitosis after overexpression of active and inactive Aurora A kinases. The duration of mitosis was not modified by the overexpression of active (FLAG-AurA OE,  $371 \pm 51$  s,  $n=56$ ) or inactive (FLAG-AurA<sup>K/R</sup> OE,  $384 \pm 84$  s,  $n=63$ ) AurA kinases, as shown by comparison with WT NBs ( $382 \pm 66$  s,  $n=64$ ). Box plot: boxes show the upper and lower quartile. ns: non significant ( $P > 0.01$ , Wilcoxon test).

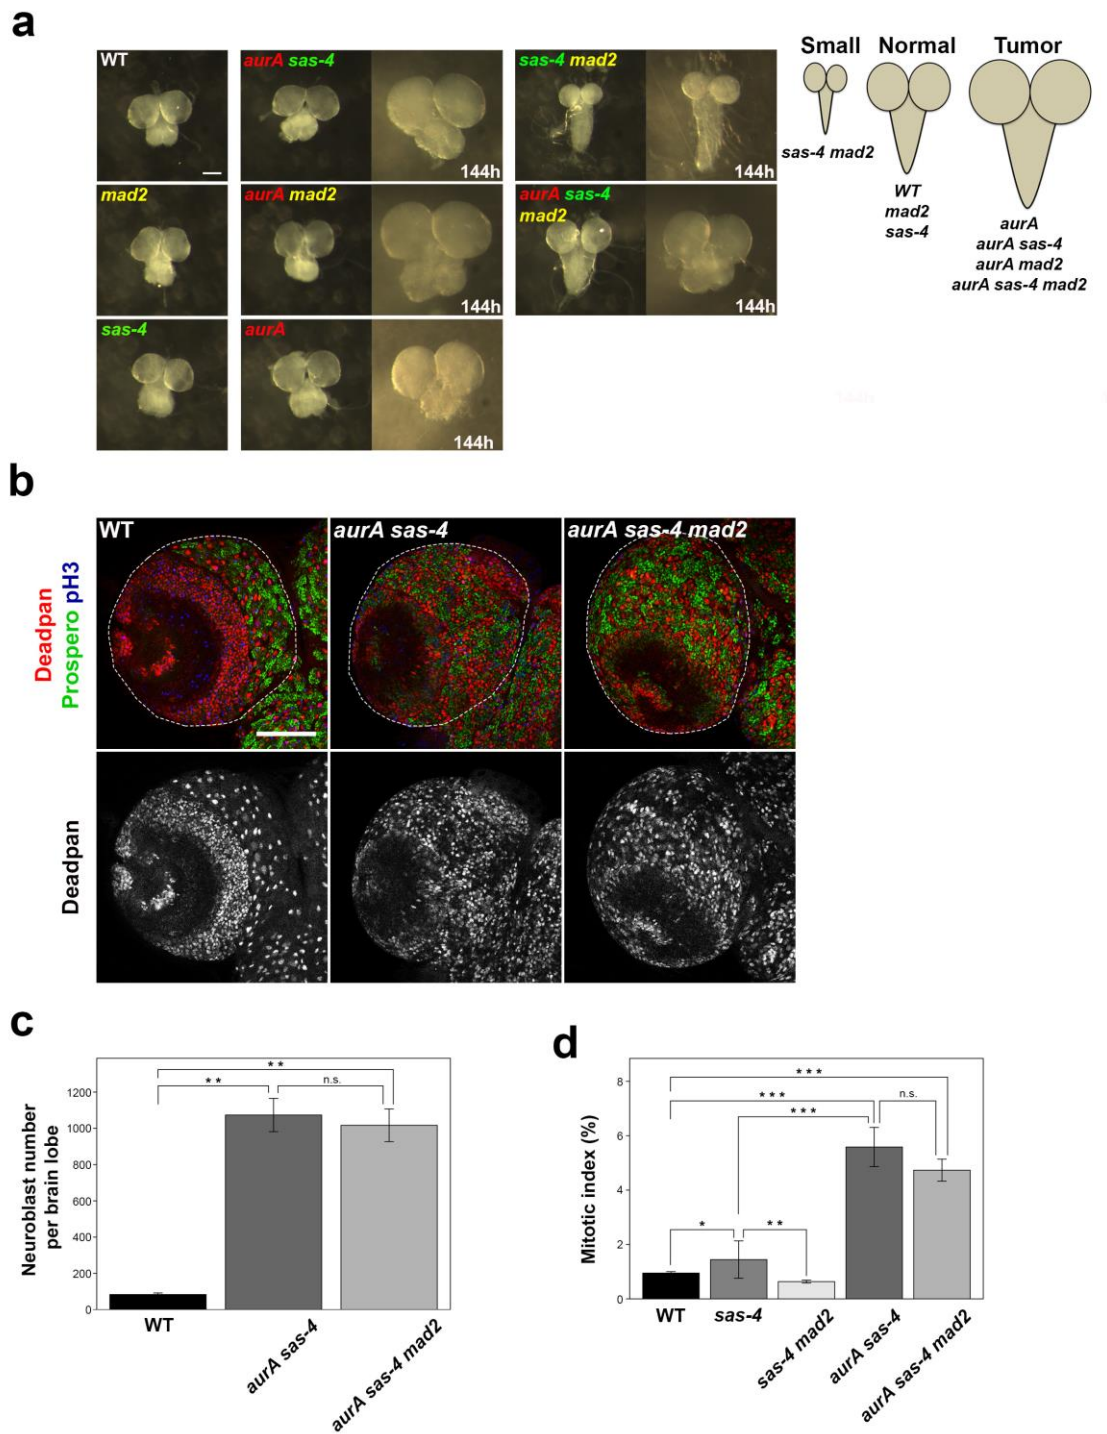

**Supplementary Figure 5. *aurA* mutation restores overproliferation of the NB phenotype in the *sas-4 mad2* double mutant**

**a)** Brains from WT, *mad2*, *sas-4 mad2*, *aurA*, *aurA sas-4*, *aurA mad2*, and *aurA sas-4 mad2* mutant individuals were dissected in PBS, fixed and immediately imaged. Note the impairment of brain growth following disruption of the SAC and *sas-4* (*mad2 sas-4*). The scale bar indicates 0.1 mm. The diagram on the left summarizes the various brain phenotypes associated with the genotypes examined. **b)** Brains from WT, *aurA sas-4* and *aurA sas-4 mad2* triple mutants were fixed and the numbers of pan-NBs per lobe were determined in the central brain region with an anti-deadpan antibody (red and lower monochrome panels). The neuronal marker prospero is shown in green. Phospho-histone H3 (Ser10) is displayed in blue. Scale bar: 100  $\mu$ m. **c)** Quantification of pan-NBs, in terms of number, in the various genetic backgrounds analyzed. WT: 83.4 ± 8.5 NBs/lobe ( $n=12$ ), *aurA sas-4*: 1073.5 ± 91.7 NBs/lobe ( $n=8$ ), *aurA sas-4 mad2*: 1016.7 ± 90.2 NBs/lobe ( $n=8$ ). \*\*:  $P < 4 \times 10^{-4}$  (Wilcoxon test). **d)** Mitotic indices in WT, *sas-4*, *aurA sas-4*, *sas-4 mad2* and *aurA sas-4 mad2* neural tissues. WT: 0.95 ± 0.05%, ( $n=5626$  cells, 3 brains), *sas-4*: 1.45 ± 0.7% ( $n=12417$  cells, 3 brains), *sas-4 mad2*: 0.63 ± 0.05%, ( $n=4962$  cells, 3 brains), *aurA sas-4*: 5.6 ± 0.7% ( $n=5348$  cells, 3 brains) *aurA sas-4 mad2*: 4.7 ± 0.4% ( $n=13209$  cells, 3 brains). \*\*\*:  $P < 2 \times 10^{-16}$ , \*\*  $P < 10^{-5}$ , \*  $P < 0.03$  (Wilcoxon test).

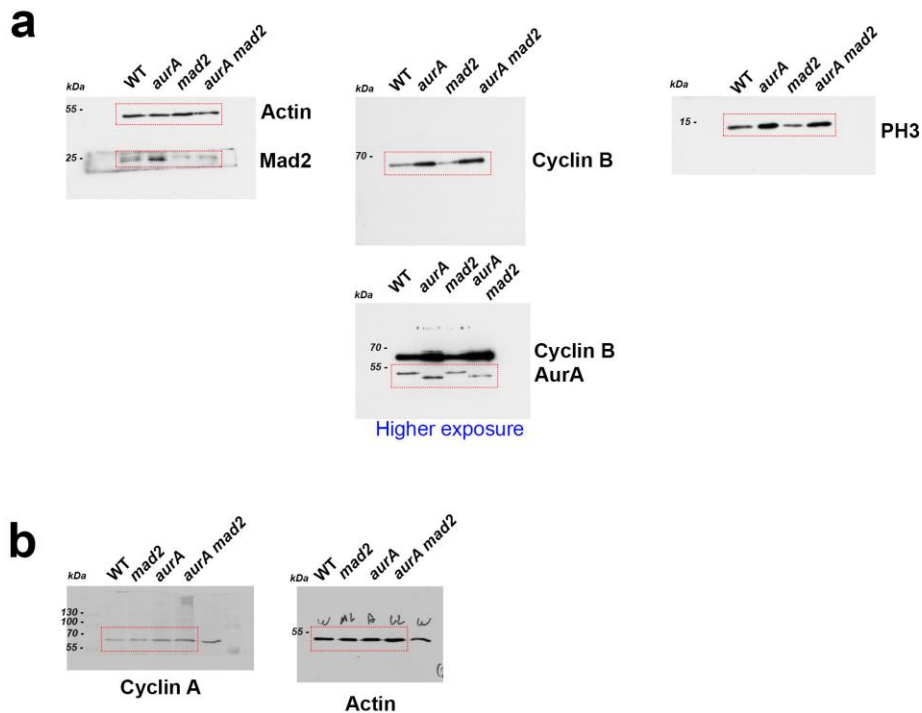

**Supplementary Figure 6. Whole western blots related to Figure 2c.**

Note that all the antibodies used for the western blots of this study correspond to well-characterised proteins. Therefore, one nitrocellulose membrane was often cutted (thanks to molecular weight markers) to detect 2 antigens.

**a)** Full western blots corresponding to the left panel of Figure 2c. Top left panel: the same nitrocellulose membrane was cutted to reveal actin (~40 kDa) and Mad2 (~24 kDa). Middle panel: the same nitrocellulose membrane was cutted to reveal cyclin B (~60 kDa) and Aurora A (47 kDa). The middle bottom panel corresponds to longer revelation time. Right: full blot corresponding to phosphor histone H3 Ser10 (~15 kDa).

**b)** Full cyclin A (left) and actin (right) western blots corresponding to the right panel of Figure 2c. The cropped region is indicated in red.
